# Supplementary material for: A Unique Immune-Related Gene Signature Represents Advanced Liver Fibrosis and Reveals Potential Therapeutic Targets
Source: MDPI journal article supplement (doi:10.3390/biomedicines10010180), 2022-01-16
Supplement: s1 [file s1]

**Supplementary Figure 1**

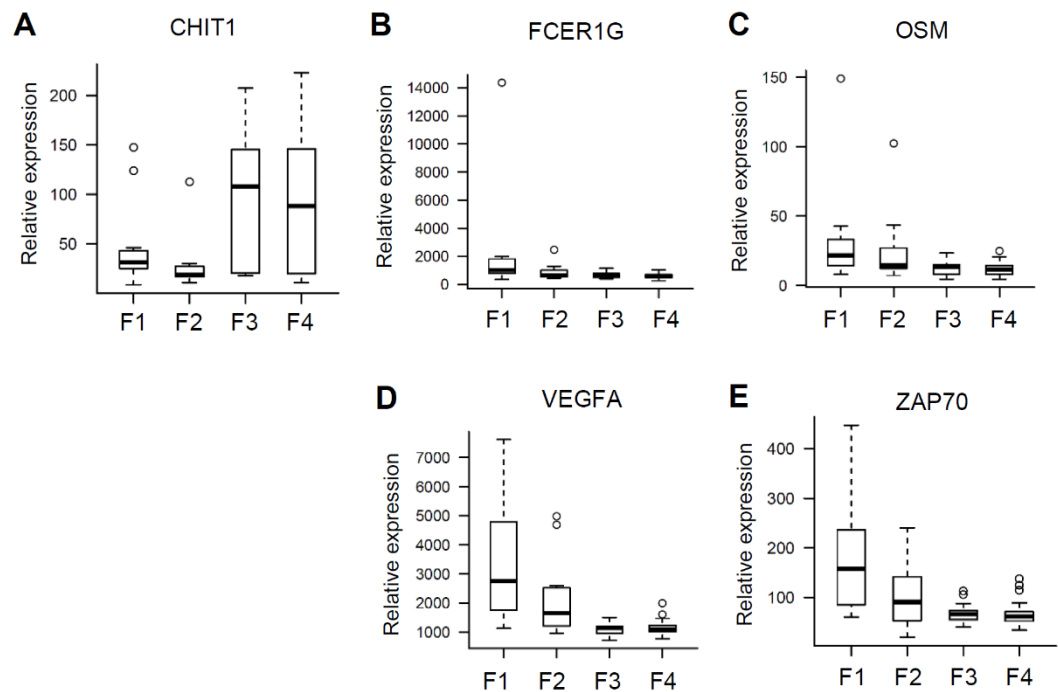

Expression of each gene comprising the gene signature in each stage of liver fibrosis. Fibrosis stage 1 (n = 12), stage 2 (n = 12), stage 3 (n = 25), and stage 4 (n = 28). (A) CHIT1. (B) FCER1G. (C) OSM. (D) VEGFA. (E) ZAP70.

Supplementary Figure 2

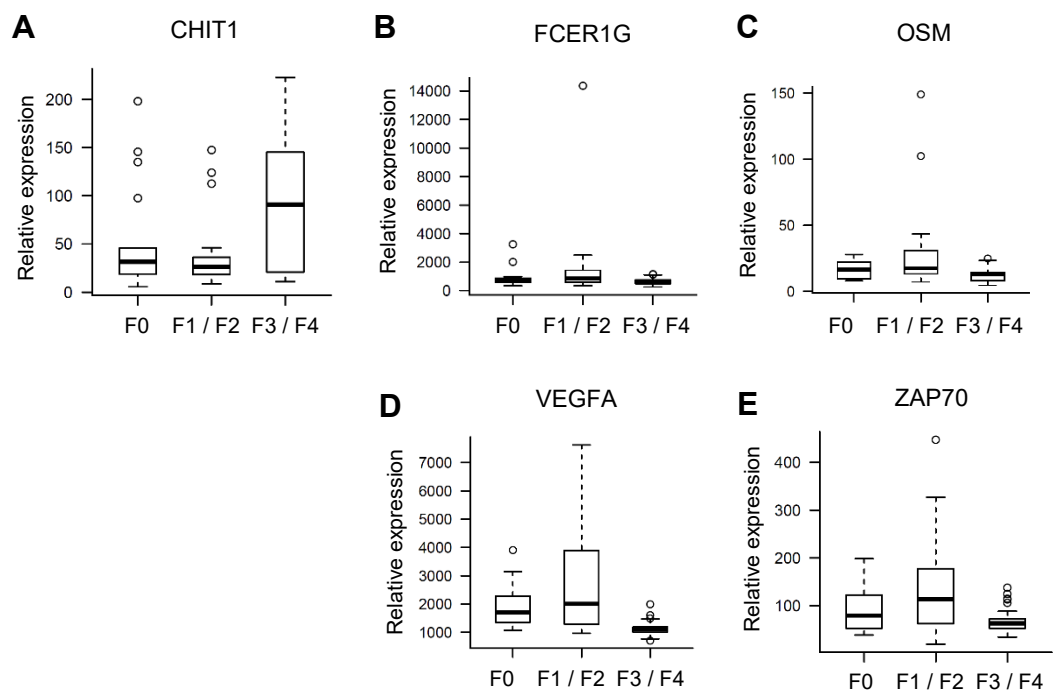

Expression of each gene comprising the gene signature in F0, F1/2, and F3/4. (A) CHIT1. (B) FCER1G. (C) OSM. (D) VEGFA. (E) ZAP70.
